# Supplementary material
Source: PubMed Central journal article supplement (PMC3398565)
Supplement: supp_tpc.112.096701_tpc096701Supplemental.pdf [file supp_tpc.112.096701_tpc096701Supplemental.pdf]

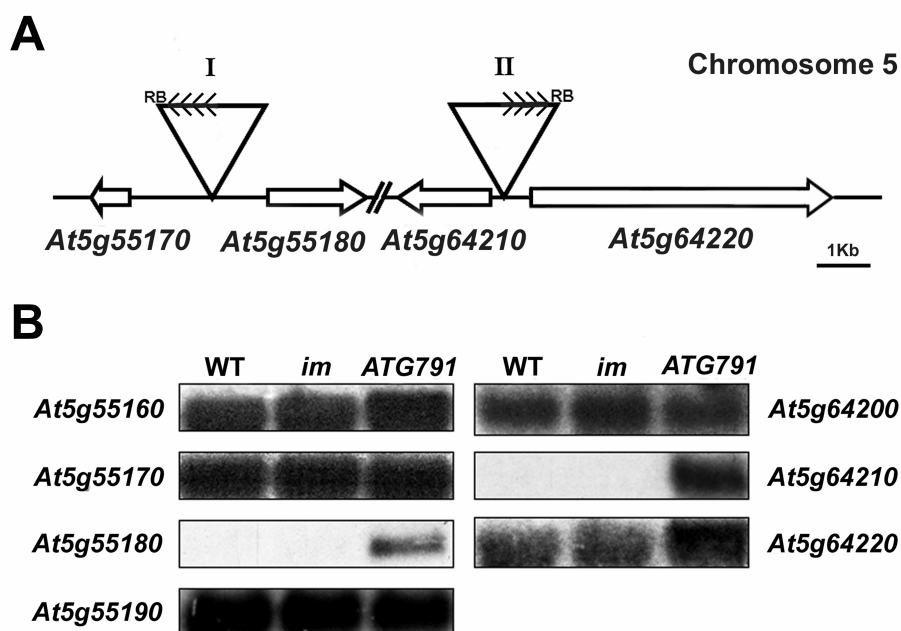

**Supplemental Figure 1.** Identification of activation-tagged genes in *ATG791*.

- A.** *ATG791* contains two T-DNA inserts (designated “I” and “II”, not drawn to scale) separated by ~3.3 Mb. These inserts are 1122 bp and 354 bp upstream from the predicted translation initiation codons of *At5g55180* and *At5g64210*, respectively. Arrowed boxes represent genes and direction of transcription; “>” indicate P35S enhancer sequences adjacent to the right T-DNA border (RB).
- B.** RNA gel blot analysis of total cell RNAs from wild type, *im* and *ATG791* seedlings. Equal amounts of RNA (1 µg) from four week-old rosette leaves were electrophoresed through formaldehyde gels and transferred to nylon filters; the filters were probed with <sup>32</sup>P-labeled gene-specific PCR products (primers are listed in Supplemental Table 1) from genes that surround inserts I (*At5g55150*, *At5g55160*, *At5g55170*, *At5g55180* & *At5g55190*) and II (*At5g64200*, *At5g64210* & *At5g64220*). Transcripts from *At5g55150* could not be detected in any of the lines.

**Supplemental Table 1. Primers used in this study**

| Primer Name | Primer Sequences                    |
|-------------|-------------------------------------|
| 55150XbaIF  | TGCTCTAGAATGGCTCTACCTTCTTCGTC       |
| 55150BamHIR | CGCGGATCCTCACTGAGGAACGTCTGTTG       |
| 55160XbaIF  | TGCTCTAGAATGTCTGCTACTCCGGAAGA       |
| 55160F1     | ATGTCTGCTACTCCGGAAGA                |
| 55160BamHIR | CGCGGATCCCTAAAAGCAGAAGAGCTTCA       |
| 55160R1     | CTAAAAGCAGAAGAGCTTCA                |
| 55170XbaIF  | TGCTCTAGAATGTCTAACCCCTCAAGATGA      |
| 55170F1     | ATGTCTAACCCCTCAAGATGA               |
| 55170BamHIR | CGCGGATCCTTAAAGCCCATTATGATCGA       |
| 55170R1     | TTAAAGCCCATTATGATCGA                |
| 55180XbaIF  | TGCTCTAGAATGGCGGTCTTCGTTTTATC       |
| 55180F2     | GAAGTGTTTCGTTCGATCCGA               |
| 55180R2     | TCCTGAAGCTTCTCCTTCGT                |
| 55180BamHI  | CGCGGATCCTCAATGCCCTGTTGGAAACT       |
| 55190XbaIF  | TGCTCTAGAATGGCTCTACCTAACCGCA        |
| 55190F1     | ATGGCTCTACCTAACCGCA                 |
| 55190BamHIR | CGCGGATCCCTACTCGAAGGTGTCATCAT       |
| 55190R1     | CTACTCGAAGGTGTCATCAT                |
| 64190F1     | ATGTCCGAGAAGTTCCCTGA                |
| 64190R1     | ATCGATCCAATTGTCTCTAA                |
| 64200F1     | ATGTCGCACTTCGGAAGGTC                |
| 64200R1     | TCATTCCGCAGCATAAGGAG                |
| 64210XbaIF  | TGCTCTAGAATGAGTCAACTCATTACGAA       |
| 64210F2     | AGACGATATGGATGCAGAGC                |
| 64210R2     | AGAAGCAAAATGGTTGACAT                |
| 64210BamHI  | CGGGGATCCTTAGTGATAACCAATCGGAG       |
| 64220XbaIF  | TGCTCTAGAATGGCGGATCGCGGATCTTT       |
| 64220F2     | GTAATGGTTATCGGGACATT                |
| 64220R2     | CTGCCACTGAATGCAGCCCA                |
| 64220BamHIR | CGCGGATCCTCATTCAAATGCAAGAGACA       |
| SKI015RI    | GCAAGAACGGAATGCGCG                  |
| SKC12       | TTGACAGTGACGACAAATCG                |
| IK054       | ATGTGATATCTAGATCCGAAAC              |
| T7          | TAATACGACTCACTATAGGG                |
| AOX1aF1     | CAAGGATCCATGATGATAACTCGCGGTGGAG     |
| AOX1aR1     | GTTGGATCCTCAATGATACCCAATTGGAGC      |
| AOX1aF2     | CAATGGATCCCCGCTAGCACGATCAC          |
| AOX1aR2     | GTTGGATCCTCAATGATACCCAATTGGAGC      |
| AOX1aF3     | CGACGGATCCCCGATCTGAAGAAGCATCATGTTCC |
| AOX1aR3     | GTTGGATCCTCAATGATACCCAATTGGAGC      |
